# Supplementary material for: Genome profiling of chronic myelomonocytic leukemia: frequent alterations of RAS and RUNX1 genes
Source: PubMed Central journal article supplement (PMC2588460; doi:10.1186/1471-2407-8-299), 2008-10-16
Supplement: 1471-2407-8-299-S2.pdf [file 1471-2407-8-299-S2.pdf]

Supplementary Table 2 : Conditions of DNA sequencing used in this study for various genes.

| Amplicon            | Sequence oligonucleotide: Forward 5'-3' | Sequence oligonucleotide: Reverse 5'-3' | Annealing | Size PCR product (bp) | PCR conditions                                         | Sequencing oligonucleotide                  |
|---------------------|-----------------------------------------|-----------------------------------------|-----------|-----------------------|--------------------------------------------------------|---------------------------------------------|
| BRAF exon 11        | TCCCTCTCAGGCATAAGGTAA                   | CGAACAGTGAATATTTCTTTGAT                 | 60°C      | 313                   | Hot Star Taq Qiagen                                    | F + R                                       |
| BRAF exon 15        | TCATAATGCTTGTCTGTAGTAGGA                | GGCCAAAAATTTAATCAGTGGA                  | 60°C      | 224                   | Hot Star Taq Qiagen                                    | F + R                                       |
| JAK2 exon 12        | CTCCTCTTTGGAGCAATTCA                    | TATCGCAACTCCCAAGTTCTC                   | 55°C      | 496                   | Hot Star Taq Qiagen                                    | internal oligo TGAATA GTCCCTACAGTGTTCAGTTT  |
| RAF1 exon 7         | GGTGTACAGGTAGAGTTTGCCC                  | TCCTTGATCAGATTTGAAACCC                  | 54°C      | 363                   | Hot Star Taq Qiagen                                    | F + R                                       |
| HRAS exon 1         | GGAGACCCTGTAGGAGGACC                    | GAGGAAGCAGGAGACAGGG                     | 60°C      | 282                   | Hot Star Taq Qiagen                                    | R + F                                       |
| HRAS exon 2         | ATGAGGGGCATGAGAGTACCAG                  | CATCCAGGACATGCCGAGAGA                   | 60°C      | 377                   | Hot Star Taq Qiagen                                    | F + R                                       |
| HRAS exon 3         | TCTCTGCCGATGTCTGGAT                     | TAGCCCCACTAAGACTCAGAACCA                | 60°C      | 619                   | Hot Star Taq Qiagen                                    | F + R                                       |
| HRAS exon 4         | AAGGCTTGATCCACAGCA                      | ACCTCCATGTCTGAGCTTGT                    | 60°C      | 340                   | Hot Star Taq Qiagen                                    | F + R                                       |
| KRAS exon 1         | GACTGAATATAAACTTGTGG                    | CTCTATTGTTGGATCATAT                     | 45°C      | 109                   | Ampli Taq Gold Applied Biosystem                       | F + R                                       |
| KRAS exon 2         | GCCATTTGTCCGTCATCTTTGGAG                | TGCATGGCATTAGCAAAGACTCA                 | 55°C      | 415                   | Hot Star Taq Qiagen + MgCl2                            | F + R                                       |
| KRAS exon 3         | AGGAAGGAAAATTTGGTGTAGTGG                | AGAAGCAATGCCCTCTCAAGAGAC                | 54°C      | 452                   | Hot Star Taq Qiagen                                    | F + R                                       |
| KRAS exon 4a        | CTTGACATGGCTTTCCAGTA                    | AGTGGTTGCCACCTTGTACCT                   | 54°C      | 272                   | Hot Star Taq Qiagen                                    | F + R                                       |
| KRAS exon 4b        | CCTGTACACATGAAGCCATCGT                  | CTAACAGTCTGCATGGAGCAGGAA                | 54°C      | 299                   | Hot Star Taq Qiagen                                    | F + R                                       |
| NRAS exon1          | TGTAGATGTGGCTCGCCAAT                    | TGATCCGACAAGTGAGAGAC                    | 55°C      | 228                   | Hot Star Taq Qiagen                                    | F + R                                       |
| NRAS exon 2         | GGCAATAGCATTGCATTCCC                    | TCCCTAGTGTGGTAACCTCA                    | 55°C      | 344                   | Hot Star Taq Qiagen                                    | F + R                                       |
| RUNX1 exon 1        | GCTGAAACAGTGACCTGTCTTGG                 | AGCTGCCATTTTACAGGCAAAGC                 | 58°C      | 219                   | Hot Star Taq Qiagen                                    | F + R                                       |
| RUNX1 exon 2        | CTCCAGTGCTAAAAAGTGAAG                   | CATATACACATCTATGAAGGTGTGATC             | 58°C      | 212                   | Ampli Taq Gold Applied Biosystem                       | internal oligo<br>GTCGGGAAAGTTAATT          |
| RUNX1 exon 3        | CGGCTTGTGTGATGCGTATCC                   | ACCACCCCTCCGGGCCAGTA                    | 58°C      | 304                   | Ampli Taq Gold Applied Biosystem + Q solution (Qiagen) | F + R                                       |
| RUNX1 exon 4        | CTGCATTTGTCCTTTGACTGGTG                 | GTGGGTTTGTGCCATGAAACGTG                 | 58°C      | 239                   | Hot Star Taq Qiagen                                    | F + R                                       |
| RUNX1 exon 5        | CAGGCCACCAACCTCATTCTGTT                 | GCCCCAAGTGGATGCACCTTAC                  | 58°C      | 173                   | Hot Star Taq Qiagen                                    | F + R                                       |
| RUNX1 exon 6        | CAATACTTTTTCTGATCTCTCCCT                | TGGGCTCCATCTGGTACTTACCC                 | 58°C      | 286                   | Ampli Taq Gold Applied Biosystem                       | R + internal oligo GCAGAACTAGATGATCAGAC     |
| RUNX1 exon 7        | CCCACCCCACTTTACATATAATTGACC             | CCCAGCTCAGCTCAAAGAATGTG                 | 58°C      | 246                   | Hot Star Taq Qiagen                                    | F + R                                       |
| RUNX1 exon 8a       | CTCACTCCGCTCCGTTCTCT                    | GGCCGAGGCGCCGTAGTACAGG                  | 58°C      | 301                   | Ampli Taq Gold Applied Biosystem + Q solution (Qiagen) | F + R                                       |
| RUNX1 exon 8b       | CCAGCTCGCCCTCTACCA                      | TTGTGCGGAACAGGAGGCC                     | 63°C      | 329                   | Ampli Taq Gold Applied Biosystem + Q solution (Qiagen) | F + R                                       |
| SOS1 exons 7 and 8  | ATTGTGCTCGCATAGTCGTG                    | AAATTCACACTGAATATGTTACAAA               | 60°C      | 426                   | Hot Star Taq Qiagen                                    | F (ex7) + R (ex8)                           |
| SOS1 exon 9         | TGCTCCCCATTTCTTTTCAG                    | CTTGAGGAGGGAAGTGGGAT                    | 60°C      | 500                   | Hot Star Taq Qiagen                                    | F + R                                       |
| SOS exon 10         | CATGAGCTCTAGGTTTCTGTCA                  | GCCAAGTGACCTCATTTTCTC                   | 60°C      | 950                   | Hot Star Taq Qiagen                                    | F + internal oligo GA TGACACCAATGAATACAAGCA |
| SOS1 exon 11        | GCAGTGCATTACCAAGTCCA                    | TTGTTCACTGACAAGTCCATTTT                 | 60°C      | 591                   | Hot Star Taq Qiagen                                    | F + R                                       |
| SPRED1 exon2        | GGTACCCTTCTGGGTGAGG                     | AAGTTTTCGATGGGTCTGG                     | 59°C      | 269                   | Hot Star Taq Qiagen                                    | F + R                                       |
| SPRED1 exon3        | AAACACCTTAGTCACCACATGTTA                | TGCCTTTAACACAGAAACAGC                   | 55°C      | 431                   | Hot Star Taq Qiagen                                    | F + R                                       |
| SPRED1 exon4        | AGCGTTGTATCACCTCAGTTTG                  | TGAGGTTTCAAAGCCTGGTC                    | 55°C      | 398                   | Hot Star Taq Qiagen                                    | F + R                                       |
| SPRED1 exon5        | TTAATTGCCAGGCAGTCCAG                    | ATGAGGGATGCTCAACCTGT                    | 55°C      | 340                   | Hot Star Taq Qiagen                                    | F + R                                       |
| SPRED1 exon6        | CATTTGAGTTTTGGGAATTGCT                  | GGGCAGATGGTTTTAACGTC                    | 55°C      | 398                   | Hot Star Taq Qiagen                                    | F + R                                       |
| SPRED1 exon7        | GGGGAAATGATTCTATTTTATTC                 | CAGCGTTTAAAGCACATAGGC                   | 55°C      | 396                   | Hot Star Taq Qiagen                                    | F + R                                       |
| SPRED1 exon8-5'     | TGCTTTCTCATAGTCCACCA                    | GGAGCATCTGACATTTTCC                     | 55°C      | 552                   | Hot Star Taq Qiagen                                    | F + R                                       |
| SPRED1 exon8-3'     | AGACGCAGCCTTCTCATT                      | AGTTAGGCATGGCGTGAAC                     | 55°C      | 569                   | Hot Star Taq Qiagen                                    | F + R                                       |
| STK11 exon 1        | ACAATCGTTTCTGTTGGAAG                    | CCAGCTCAGGGTGTAAAGAG                    | 55°C      | 579                   | Hot Star Taq Qiagen                                    | F + R                                       |
| STK11 exon 2        | CACTGTGAACCTCACGCTTCTC                  | AGCCATTGCCACAATGGCTGACTTC               | 55°C      | 390                   | Hot Star Taq Qiagen                                    | F + R                                       |
| STK11 exon 3        | CCTGAGCTGTGTCTTACGCG                    | ATATCAGGACAAGCAGTGTG                    | 55°C      | 212                   | Hot Star Taq Qiagen                                    | F + R                                       |
| STK11 exons 4 and 5 | GTGTGGCTCCCTGCTGGACCTAGCCTTTC           | TACATTTCCATAAAGTAAGCACCCCTA             | 55°C      | 667                   | Hot Star Taq Qiagen                                    | F + R                                       |
| STK11 exon 6        | CGTCAACCACCTTGACTGACCACG                | CCTGTGGGGTCTCGGGCCAAATAG                | 55°C      | 289                   | Hot Star Taq Qiagen                                    | F + R                                       |
| STK11 exon 7        | TTAGGAGCGTCCAGGTATCACCC                 | ACCCACCACGCGCTGCTAGCG                   | 55°C      | 271                   | Hot Star Taq Qiagen                                    | F + R                                       |
| STK11 exon 8        | GAGGACATGGCTGAGCTTCTGTGGT               | AAGCTGTCTTGTGTCAGACA                    | 55°C      | 443                   | Hot Star Taq Qiagen                                    | F + R                                       |
| STK11 exon 9        | CAGCATTCAGGCTGGATACACCT                 | ACGGTCACCATGACTGACTA                    | 55°C      | 465                   | Hot Star Taq Qiagen                                    | F + R                                       |
